# Supplementary material
Source: MDPI journal article supplement (https://www.mdpi.com/2073-4433/13/2/188)
Supplement: s1 [file s1 › atmosphere-1538705-supplementary.pdf]

# Interfacial dark aging is an overlooked source of aqueous secondary organic aerosol

*Fei Zhang,<sup>a,b,c</sup> Manh Thuong Nguyen,<sup>d</sup> Yao Fu,<sup>c</sup> and Xiao-Ying Yu<sup>c,\*</sup>*

<sup>a</sup> College of Environmental and Resource Sciences, Zhejiang University, Hangzhou 310058, China

<sup>b</sup> State Environmental Protection Key Laboratory of Formation and Prevention of Urban Air Pollution Complex, Shanghai Academy of Environment Sciences, Shanghai 200233, China

<sup>c</sup> Energy and Environment Directorate, Pacific Northwest National Laboratory, Richland, WA 99354, USA

<sup>d</sup> Physical and Computational Sciences Directorate, Pacific Northwest National Laboratory, Richland, WA 99354, USA

**\*Corresponding author:** Dr. Xiao-Ying Yu: [xiaoying.yu@pnnl.gov](mailto:xiaoying.yu@pnnl.gov); Tel: 509-372-4524; Fax: 509-375-2999

## Table of Contents

|                                                                                                                                                                                                                                                                                                                                                                                 |      |
|---------------------------------------------------------------------------------------------------------------------------------------------------------------------------------------------------------------------------------------------------------------------------------------------------------------------------------------------------------------------------------|------|
| Supporting Method Details.....                                                                                                                                                                                                                                                                                                                                                  | S-4  |
| Dry reference sample preparation .....                                                                                                                                                                                                                                                                                                                                          | S-4  |
| Computational methods for surface cluster ion formation .....                                                                                                                                                                                                                                                                                                                   | S-4  |
| Supporting Figures .....                                                                                                                                                                                                                                                                                                                                                        | S-5  |
| <b>Fig. S1a.</b> Liquid ToF-SIMS spectral comparison of water control, glyoxal and hydrogen peroxide, and the glyoxal control undergoing 6 hr. dark aging (a) in the mass to charge ( $m/z^+$ ) range of 0 – 300 and (b) 300 – 700 in the positive ion mode, respectively. Red bars represent the locations of water cluster peaks, blue oligomers, and cyan cluster ions. .... | S-5  |
| <b>Fig. S1b.</b> Liquid ToF-SIMS spectral comparison of water control, glyoxal and hydrogen peroxide, and the glyoxal control undergoing 6 hr. dark aging (a) in the $m/z^-$ range of 0 – 300 and (b) 300 – 700 in the negative ion mode, respectively. Red bars represent the locations of water cluster peaks, blue oligomers, and cyan cluster ions. ....                    | S-6  |
| <b>Fig. S2a.</b> Liquid SIMS spectral reproducibility of 6 hr. UV aging in the positive ion mode ( $m/z^+ 1 - 700$ ). Red color represents water clusters, green carboxylic acids, pink hydration products, blue oligomers, and cyan cluster ions. ....                                                                                                                         | S-7  |
| <b>Fig. S2b.</b> Liquid SIMS spectral reproducibility of 6 hr. UV aging in the negative ion mode ( $m/z^- 1 - 700$ ). Red color represents water clusters, green carboxylic acids, pink hydration products, blue oligomers, and cyan cluster ions. ....                                                                                                                         | S-8  |
| <b>Fig. S2c.</b> Liquid SIMS spectral reproducibility of 6 hr. dark aging in the positive ion mode ( $m/z^+ 1 - 700$ ). Red color represents water clusters, green carboxylic acids, pink hydration products, blue oligomers, and cyan cluster ions. ....                                                                                                                       | S-9  |
| <b>Fig. S2d.</b> Liquid SIMS spectral reproducibility of 6 hr. dark aging in the negative ion mode ( $m/z^- 1 - 700$ ). Red color represents water clusters, green carboxylic acids, pink hydration products, blue oligomers, and cyan cluster ions. ....                                                                                                                       | S-10 |
| <b>Fig. S3a.</b> Comparison of all dark aging SIMS spectral data in the positive ion mode (a) $m/z^+ 1 - 300$ and (b) $m/z^+ 300 - 700$ . Red color bars depict the location of water clusters, green carboxylic acids, pink hydration products, blue oligomers, and cyan cluster ions. All spectra were normalized to total ion intensities. ....                              | S-11 |
| <b>Fig. S3b.</b> Comparison of all dark aging SIMS spectral data in the negative ion mode (a) $m/z^- 1 - 300$ and (b) $m/z^- 300 - 700$ . Red color bars depict the location of water clusters, green carboxylic acids, pink hydration products, blue oligomers, and cyan cluster ions. All spectra were normalized to total ion intensities. ....                              | S-12 |
| <b>Fig. S3c.</b> Comparison of all UV aging SIMS spectral data in the positive ion mode (a) $m/z^+ 1 - 300$ and (b) $m/z^+ 300 - 700$ . Red color bars indicate water clusters, green carboxylic acids, pink hydration products, blue oligomers, and cyan color cluster ions. All the spectra were normalized to total ion intensities. ....                                    | S-13 |

|                                                                                                                                                                                                                                                                                                                               |      |
|-------------------------------------------------------------------------------------------------------------------------------------------------------------------------------------------------------------------------------------------------------------------------------------------------------------------------------|------|
| <b>Fig. S3d.</b> Comparison of all UV aging spectral data in the negative mode (a) $m/z^-$ 1 – 300 and (b) $m/z^-$ 300 – 700. Red color bars indicate water clusters, green carboxylic acids, pink hydration products, blue oligomers, and cyan color cluster ions. All spectra were normalized to total ion intensities..... | S-14 |
| <b>Fig. S4.</b> Comparison of the trend between the number of water molecules in co-occurring water clusters and cluster ions in the UV and dark aging in the negative mode. ....                                                                                                                                             | S-15 |
| Supporting Tables.....                                                                                                                                                                                                                                                                                                        | S-16 |
| <b>Table S1.</b> The sample matrices of the glyoxal and hydrogen peroxide oxidation experiments under UV and dark conditions. ....                                                                                                                                                                                            | S-16 |
| <b>Table S2.</b> The liquid ToF-SIMS measurement uncertainties (%) of 6 hr. of glyoxal and hydrogen peroxide from UV and dark aging experiments. ....                                                                                                                                                                         | S-17 |
| <b>Table S3.</b> The main products identified in UV and dark aging in the positive ion mode. ...                                                                                                                                                                                                                              | S-18 |
| <b>Table S4.</b> The main products identified in dark and UV aging in the negative ion mode. ....                                                                                                                                                                                                                             | S-20 |
| <b>Table S5.</b> The calculated binding energy of representative cluster ions using AIMD simulations. ....                                                                                                                                                                                                                    | S-23 |
| References .....                                                                                                                                                                                                                                                                                                              | S-24 |

## Supporting Method Details

### Dry reference sample preparation

The dry reference sample preparation processes follow the same procedure in our recent publication (Sui et al., 2018). First, we cleaned the Si wafer thoroughly with acetone, isopropanol, and DI water for 1 min each. Afterwards, we dried the Si wafer by N<sub>2</sub> gas and treated the wafers with UV-O<sub>3</sub> plasma (Model No.342, Jelight Company Inc., USA) for 1 min. to remove the organic residues on the wafers. Then, we prepared the samples with a concentration of 1 mg/mL in the fume hood. Finally, we dispensed the aqueous solution onto the clean Si wafer and covered the wafer with a petri dish in the fume hood during drying.

### Computational methods for surface cluster ion formation

For the H<sup>+</sup>(H<sub>2</sub>O)<sub>n</sub> clusters (n=3,6), the binding energy was calculated Eqn. (S1),

$$E_{\text{binding}} = \frac{1}{n} [E(\text{H}^+(\text{H}_2\text{O})_n) - (n-1)E(\text{H}_2\text{O}) - E(\text{H}^+\text{H}_2\text{O})] \quad \text{Eqn. (S1)}$$

in which E(H<sub>2</sub>O) and E(H<sup>+</sup>H<sub>2</sub>O) are the energy of a H<sub>2</sub>O and H<sup>+</sup>H<sub>2</sub>O molecule, respectively.

Our MD calculations predict the binding energy of -81 and -70 kJ/mol for the H<sup>+</sup>(H<sub>2</sub>O)<sub>3</sub> and H<sup>+</sup>(H<sub>2</sub>O)<sub>6</sub>, respectively. The binding energy per molecule was then calculated using Eqn. (S2):

$$E_{\text{binding}} = \frac{1}{4} [E(\text{H}^+(\text{H}_2\text{O})_3(\text{C}_2\text{H}_2\text{O}_2)) - 2E(\text{H}_2\text{O}) - E(\text{H}^+\text{H}_2\text{O}) - E(\text{C}_2\text{H}_2\text{O}_2)] \quad \text{Eqn. (S2)}$$

which leads to -84 kJ/mol.

For the  $m/z^+$  165 H<sup>+</sup>C<sub>2</sub>H<sub>3</sub>O<sub>3</sub>···C<sub>2</sub>H<sub>2</sub>O<sub>4</sub> cluster, the binding energy was calculated using Eqn. (S3):

$$E_{\text{binding}} = \frac{1}{2} [E(\text{H}^+(\text{C}_2\text{H}_3\text{O}_3)(\text{C}_2\text{H}_2\text{O}_4)) - E(\text{H}^+(\text{C}_2\text{H}_2\text{O}_4)) - E(\text{C}_2\text{H}_3\text{O}_3)] \quad \text{Eqn. (S3)}$$

Here the two molecular constituents H<sup>+</sup>C<sub>2</sub>H<sub>3</sub>O<sub>3</sub> and C<sub>2</sub>H<sub>2</sub>O<sub>4</sub> were not considered at their reference states because the sum of their energies is higher than those of the two constituents H<sup>+</sup>C<sub>2</sub>H<sub>2</sub>O<sub>4</sub> and C<sub>2</sub>H<sub>3</sub>O<sub>3</sub>, respectively. In this case, the binding energy was -62 kJ/mol.

For the  $m/z^+$  173 H<sup>+</sup>C<sub>4</sub>H<sub>10</sub>O<sub>6</sub>···H<sub>2</sub>O cluster, the binding energy was calculated using Eqn. (S4)

$$E_{\text{binding}} = \frac{1}{2} [E(\text{H}^+(\text{C}_4\text{H}_{10}\text{O}_6)(\text{H}_2\text{O})) - E(\text{H}^+(\text{C}_4\text{H}_{10}\text{O}_6)) - E(\text{H}_2\text{O})] \quad \text{Eqn. (S4)}$$

Similarly, the reference state of H<sup>+</sup>C<sub>4</sub>H<sub>10</sub>O<sub>6</sub> and H<sub>2</sub>O was chosen because it is more stable than that of C<sub>4</sub>H<sub>10</sub>O<sub>6</sub> and H<sup>+</sup>H<sub>2</sub>O. In this case the binding energy is -53 kJ/mol.

Finally, for the  $m/z^+$  263 H<sup>+</sup>C<sub>4</sub>H<sub>8</sub>O<sub>6</sub>···C<sub>2</sub>H<sub>6</sub>O<sub>5</sub>, the binding energy was calculated using Eqn. (S5):

$$E_{\text{binding}} = \frac{1}{2} [E(\text{H}^+(\text{C}_4\text{H}_8\text{O}_6)(\text{C}_2\text{H}_6\text{O}_5)) - E(\text{H}^+(\text{C}_4\text{H}_8\text{O}_6)) - E(\text{C}_2\text{H}_6\text{O}_5)] \quad \text{Eqn. (S5)}$$

The reference state is chosen as H<sup>+</sup>C<sub>4</sub>H<sub>8</sub>O<sub>6</sub> and C<sub>2</sub>H<sub>6</sub>O<sub>5</sub> because the proton only resides at C<sub>4</sub>H<sub>8</sub>O<sub>6</sub> in the MD simulation of this  $m/z^+$  263 ion, and the binding energy in this case is -70 kJ/mol.

## Supporting Figures

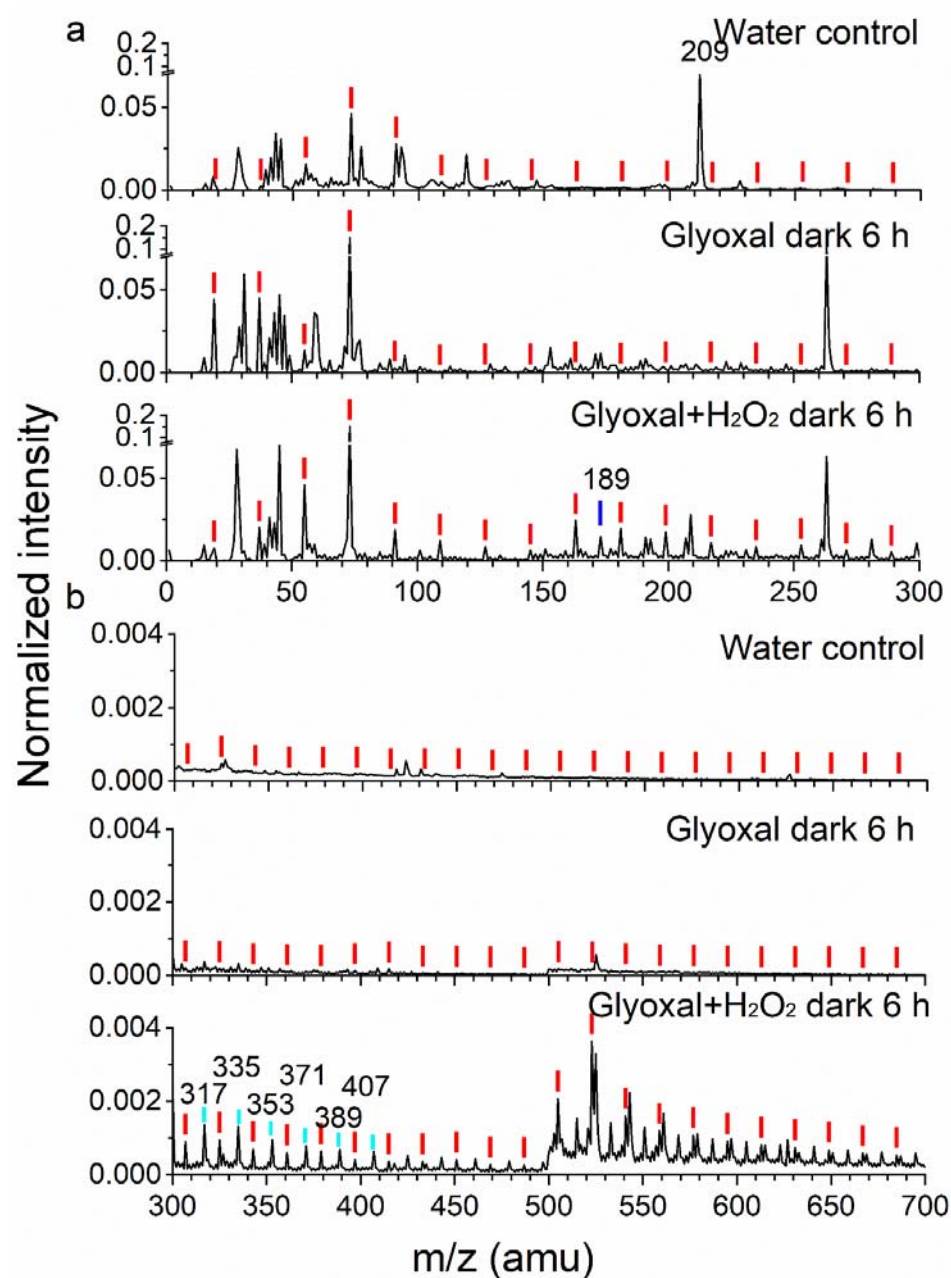

**Fig. S1a.** Liquid ToF-SIMS spectral comparison of water control, glyoxal and hydrogen peroxide, and the glyoxal control undergoing 6 hr. dark aging (a) in the mass to charge ( $m/z^+$ ) range of 0 – 300 and (b) 300 – 700 in the positive ion mode, respectively. Red bars represent the locations of water cluster peaks, blue oligomers, and cyan cluster ions.

Fig. S1 supports additional in situ liquid SIMS spectral data to support Fig. 2 in the main text. Fig. S1 shows cluster ion formation in the dark aging samples when compared against the water control and glyoxal control after 6 hr. of aging in the negative mode.

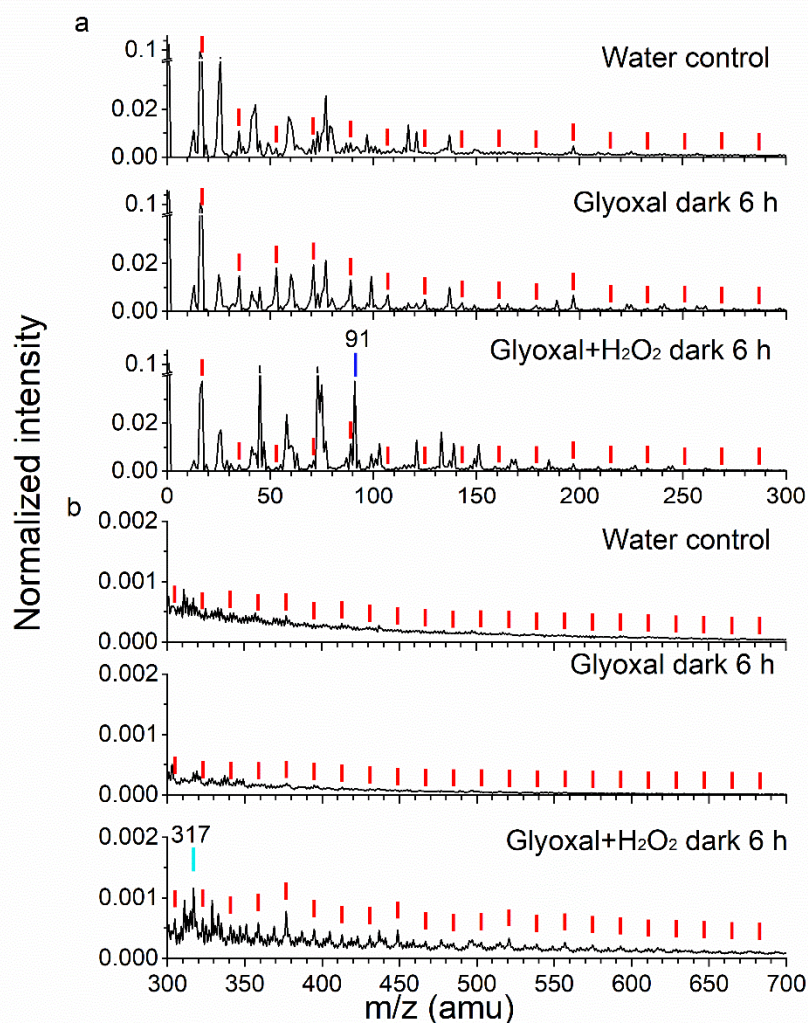

**Fig. S1b.** Liquid ToF-SIMS spectral comparison of water control, glyoxal and hydrogen peroxide, and the glyoxal control undergoing 6 hr. dark aging (a) in the  $m/z^-$  range of 0 – 300 and (b) 300 – 700 in the negative ion mode, respectively. Red bars represent the locations of water cluster peaks, blue oligomers, and cyan cluster ions.

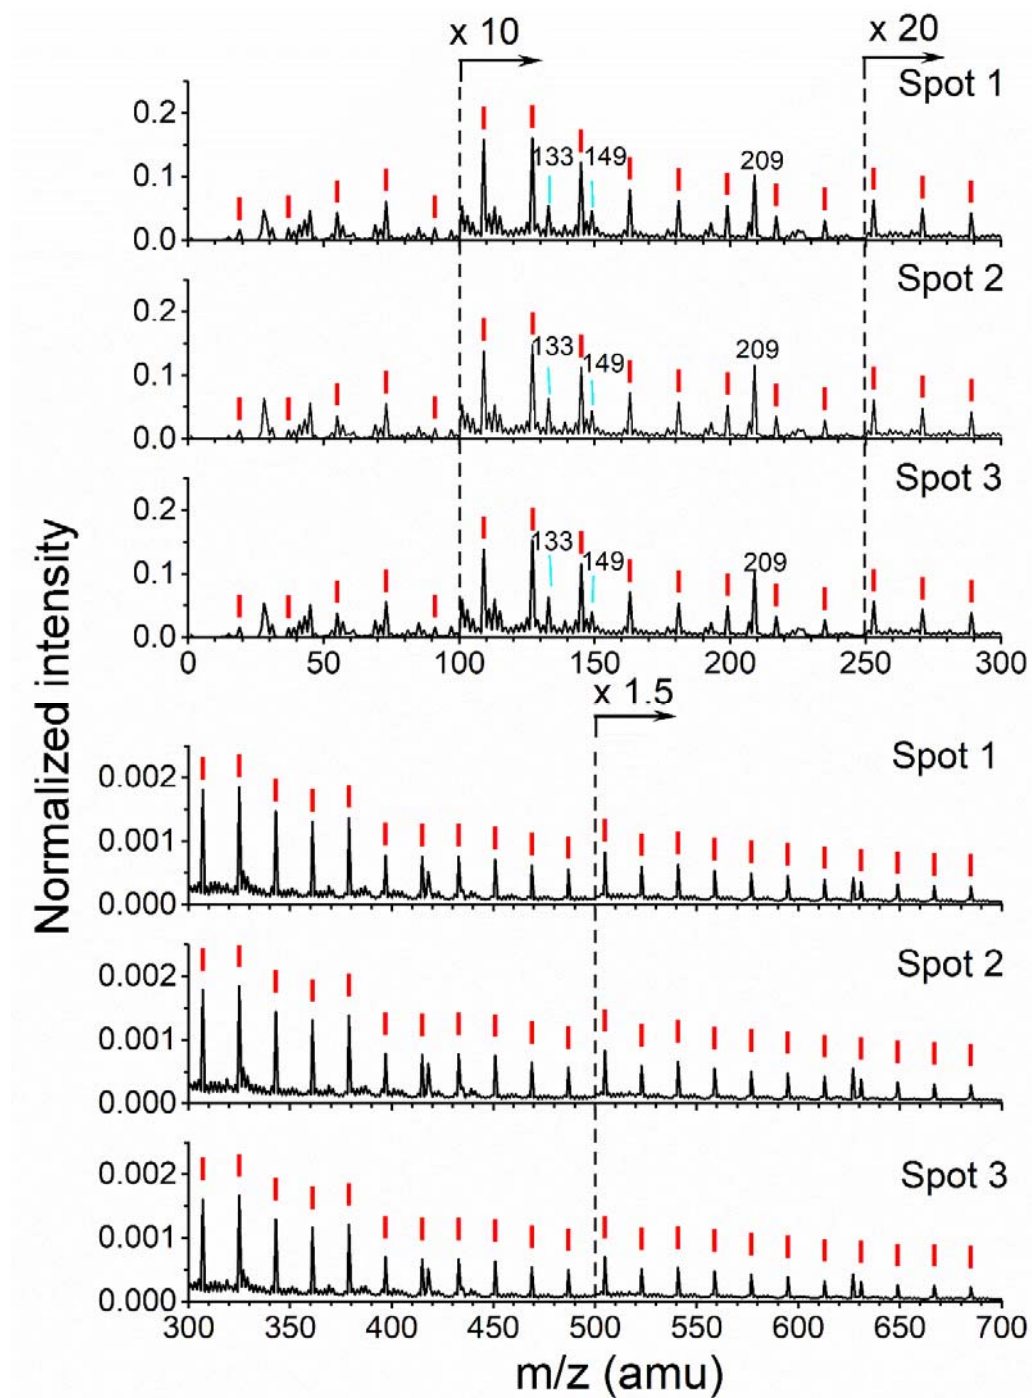

**Fig. S2a.** Liquid SIMS spectral reproducibility of 6 hr. UV aging in the positive ion mode ( $m/z^+ 1 - 700$ ). Red color represents water clusters, green carboxylic acids, pink hydration products, blue oligomers, and cyan cluster ions.

Figs. S2a-d show the reproducibility of liquid ToF-SIMS measurement of the UV aging and dark aging results in the positive and negative mode. The measurement uncertainty of the experiments based on in situ liquid SIMS measurements is calculated using the following equation:  $\text{Uncertainty} = | \text{Intensity of one spot} - \text{average intensity of 3 spots} | / \text{average intensity of 3 spots}$ . The results are summarized in Table S2.

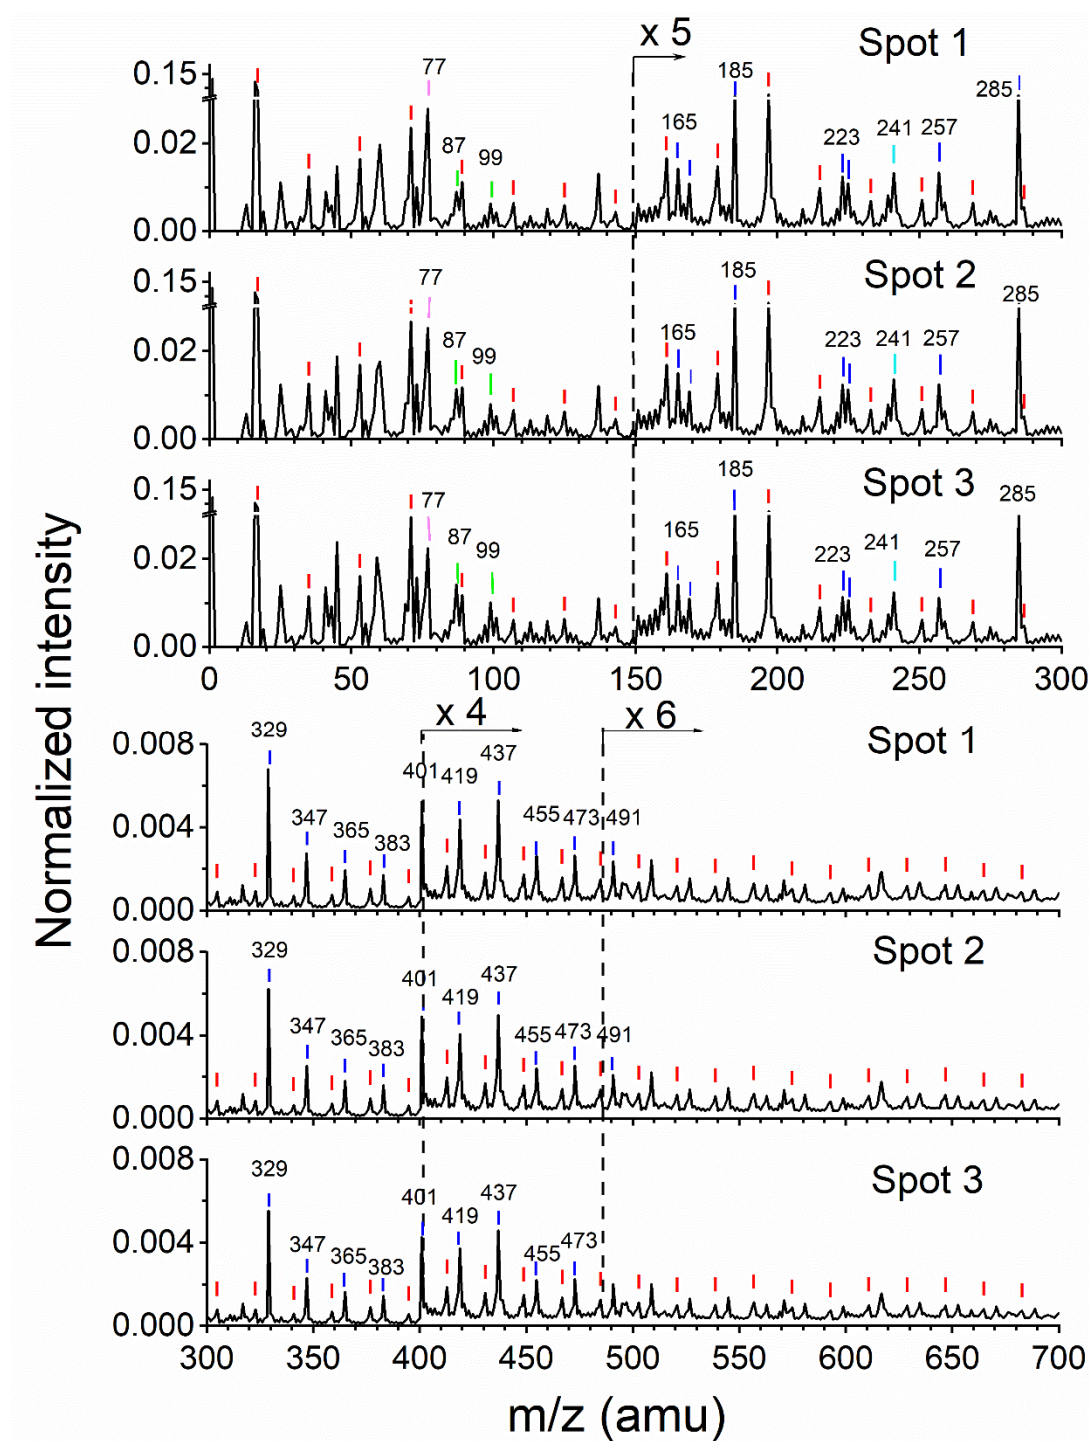

**Fig. S2b.** Liquid SIMS spectral reproducibility of 6 hr. UV aging in the negative ion mode ( $m/z^- 1 - 700$ ). Red color represents water clusters, green carboxylic acids, pink hydration products, blue oligomers, and cyan cluster ions.

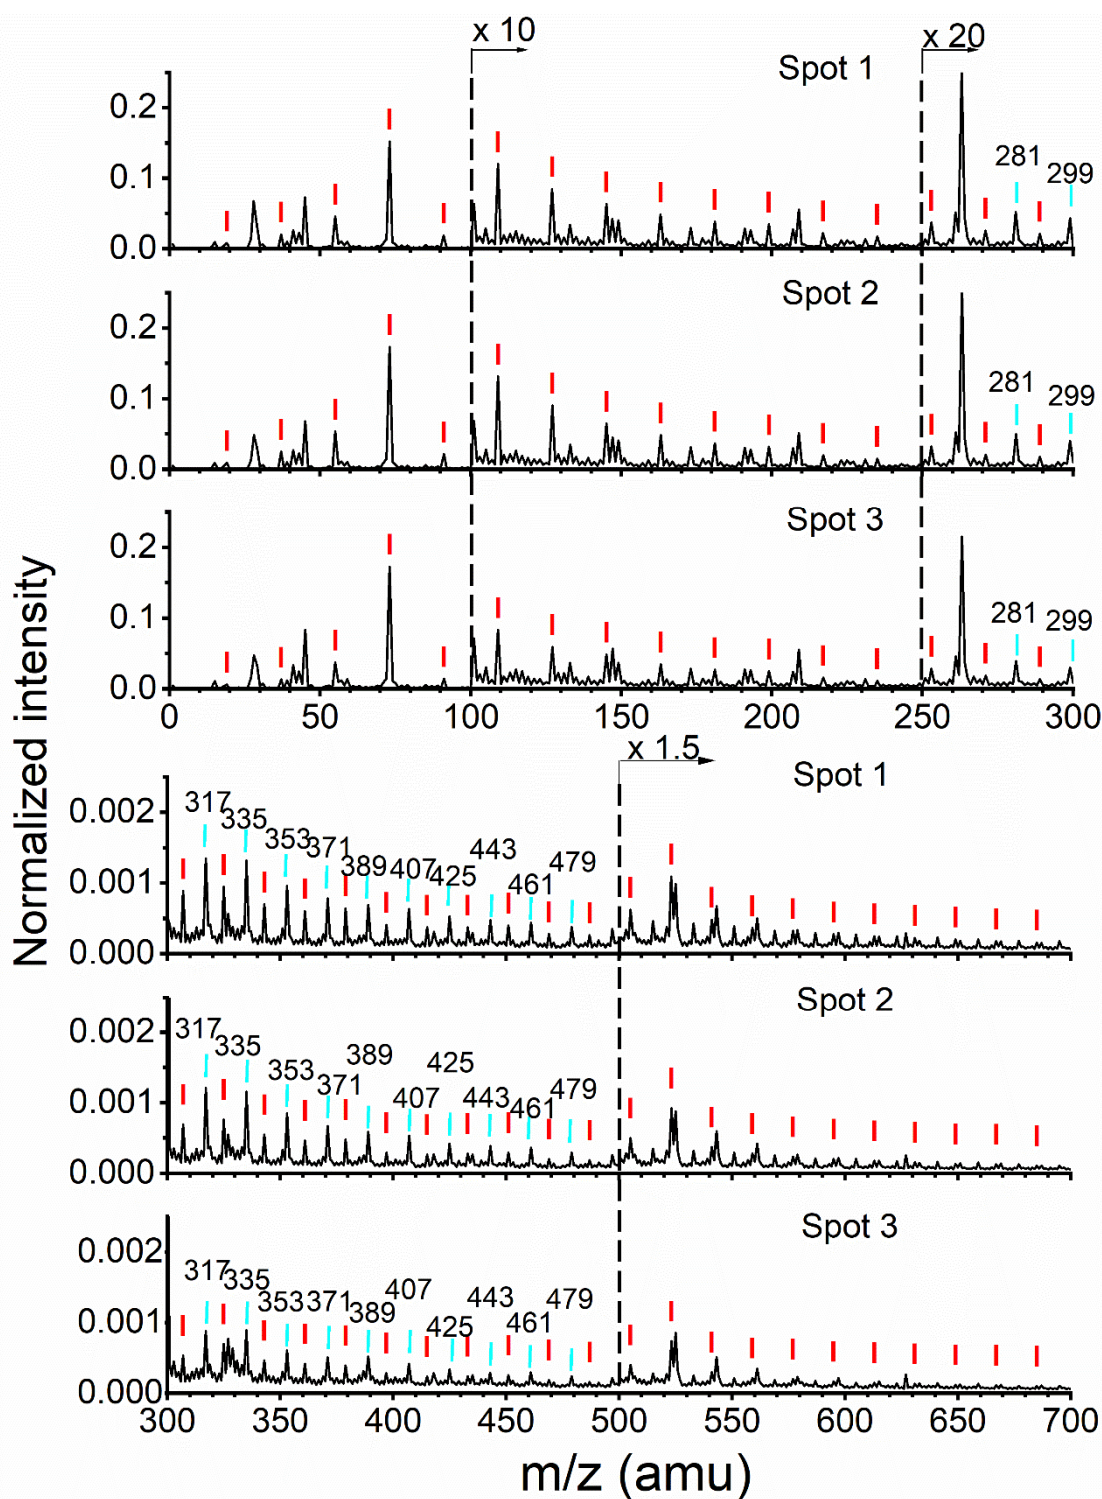

**Fig. S2c.** Liquid SIMS spectral reproducibility of 6 hr. dark aging in the positive ion mode ( $m/z^+ 1 - 700$ ). Red color represents water clusters, green carboxylic acids, pink hydration products, blue oligomers, and cyan cluster ions.

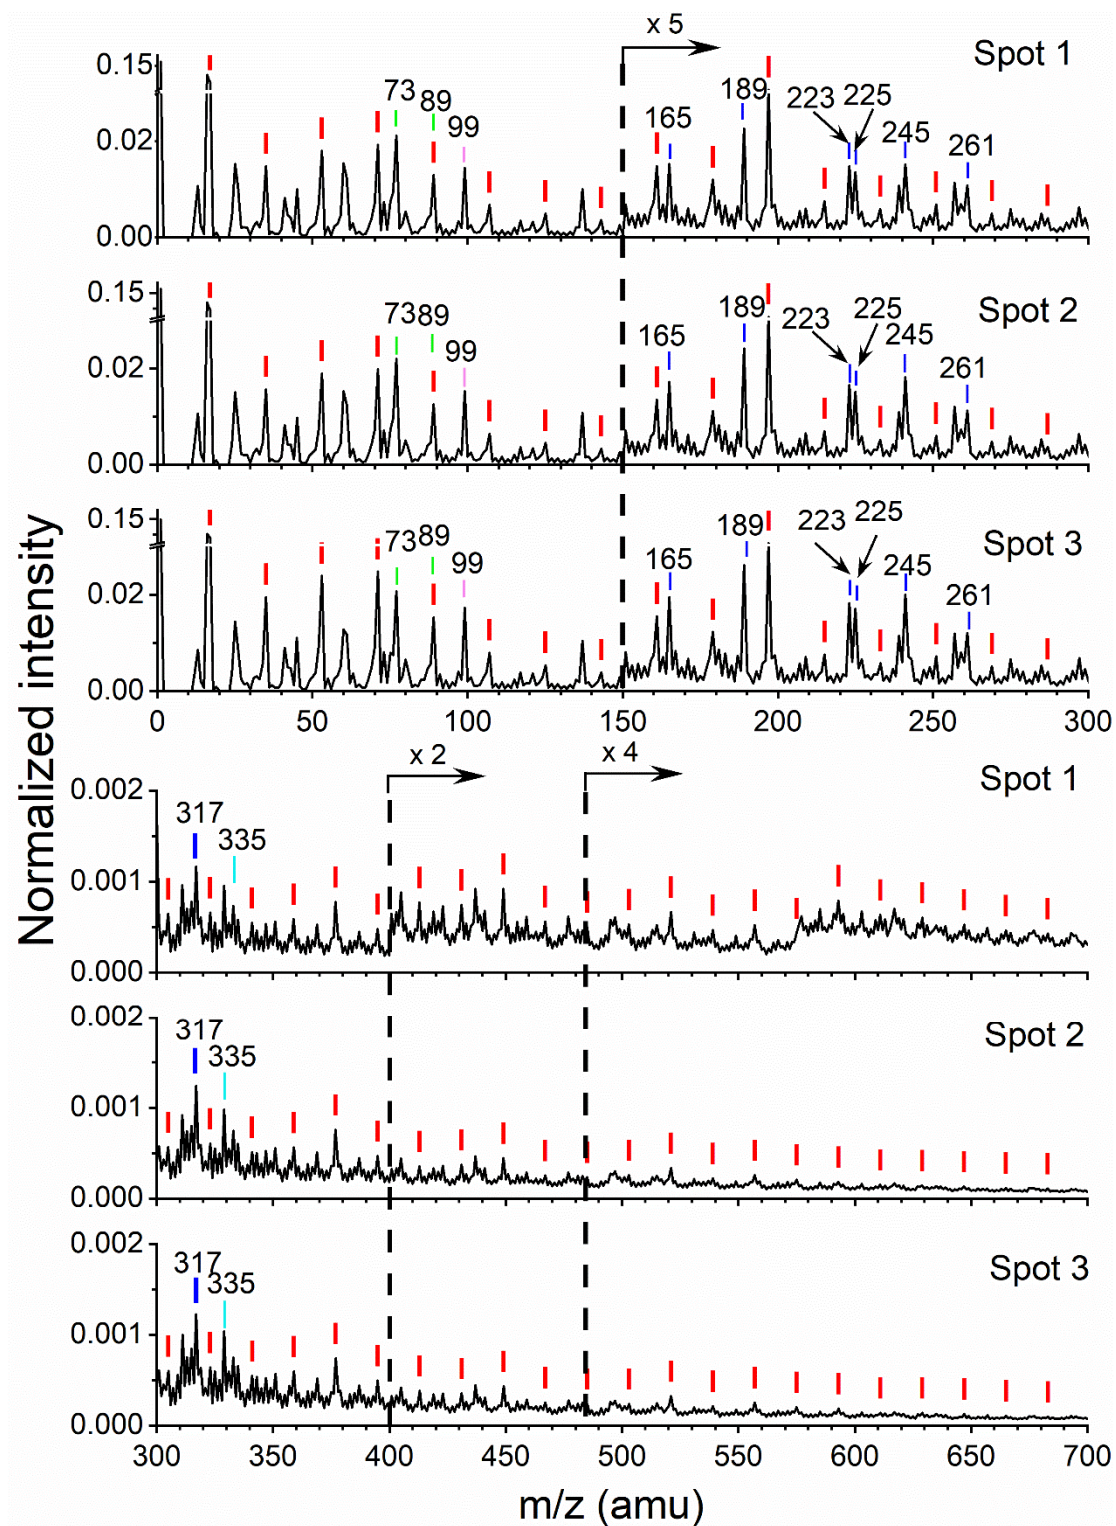

**Fig. S2d.** Liquid SIMS spectral reproducibility of 6 hr. dark aging in the negative ion mode ( $m/z^-$  1 – 700). Red color represents water clusters, green carboxylic acids, pink hydration products, blue oligomers, and cyan cluster ions.

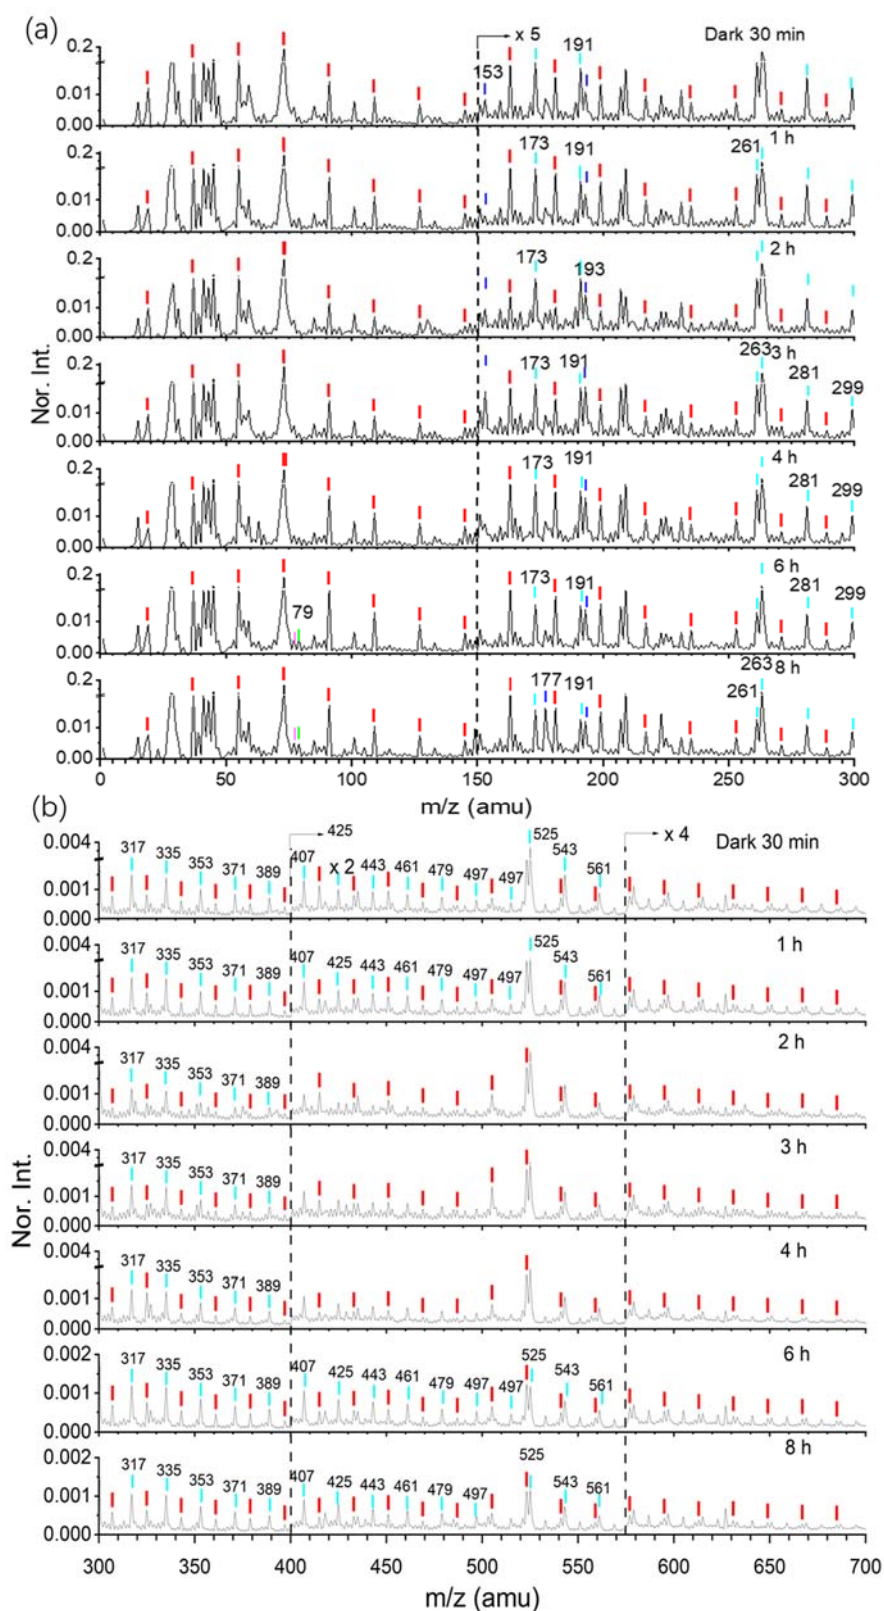

**Fig. S3a.** Comparison of all dark aging SIMS spectral data in the positive ion mode (a)  $m/z^+ 1 - 300$  and (b)  $m/z^+ 300 - 700$ . Red color bars depict the location of water clusters, green carboxylic acids, pink hydration products, blue oligomers, and cyan cluster ions. All spectra were normalized to total ion intensities.

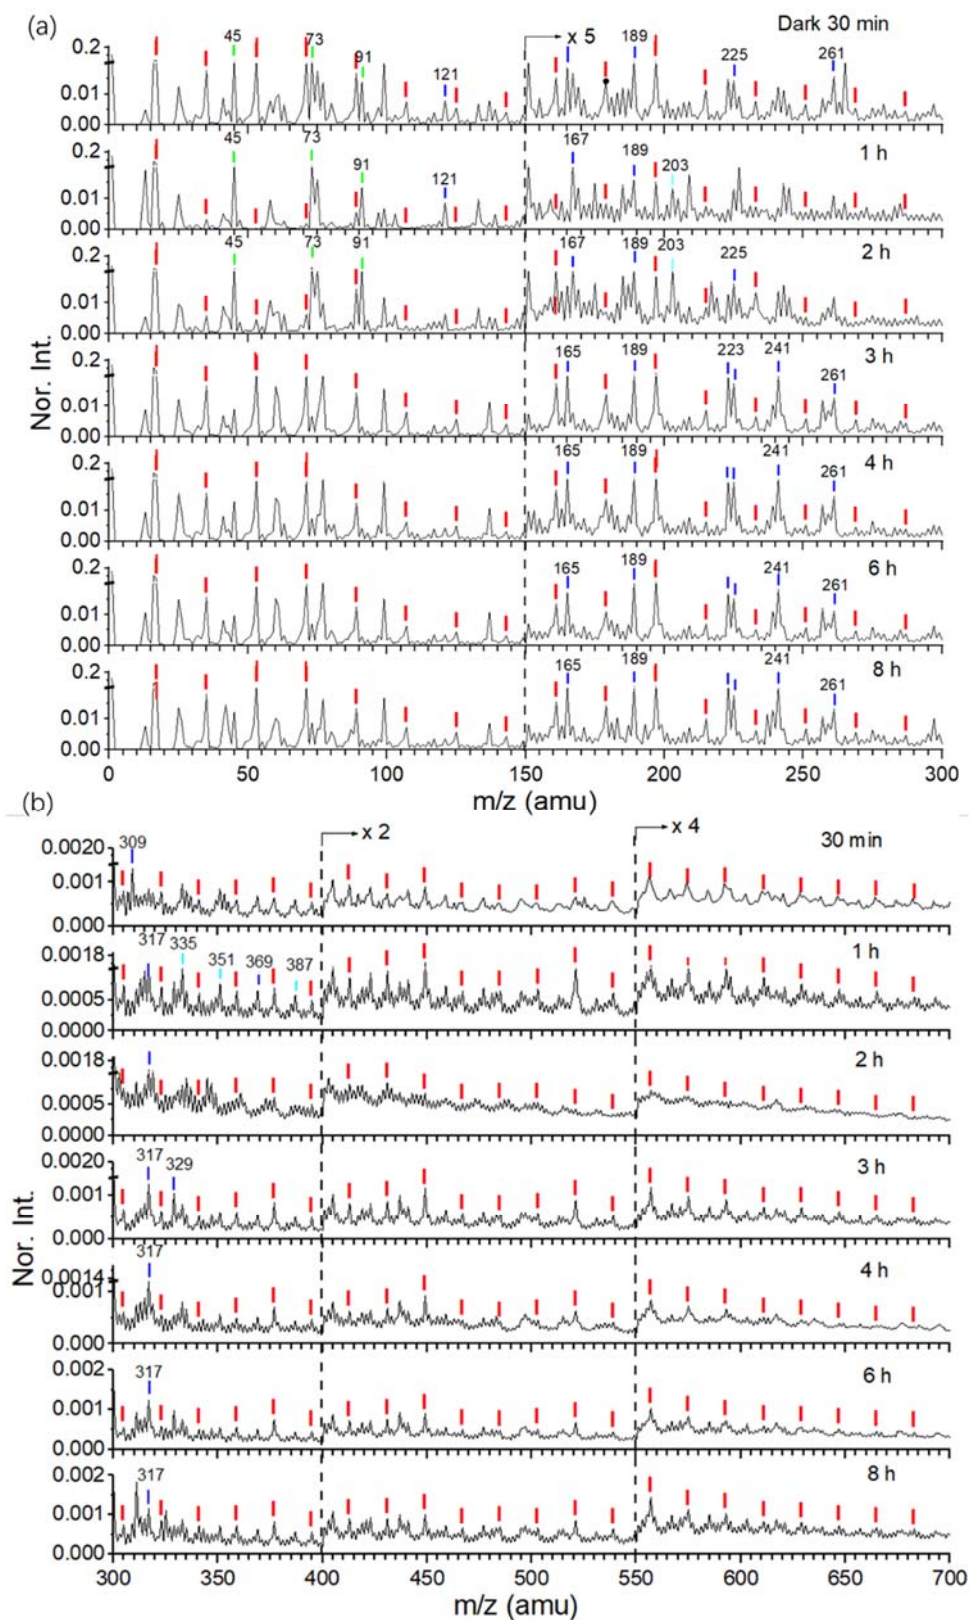

**Fig. S3b.** Comparison of all dark aging SIMS spectral data in the negative ion mode (a)  $m/z$  1 – 300 and (b)  $m/z$  300 – 700. Red color bars depict the location of water clusters, green carboxylic acids, pink hydration products, blue oligomers, and cyan cluster ions. All spectra were normalized to total ion intensities.

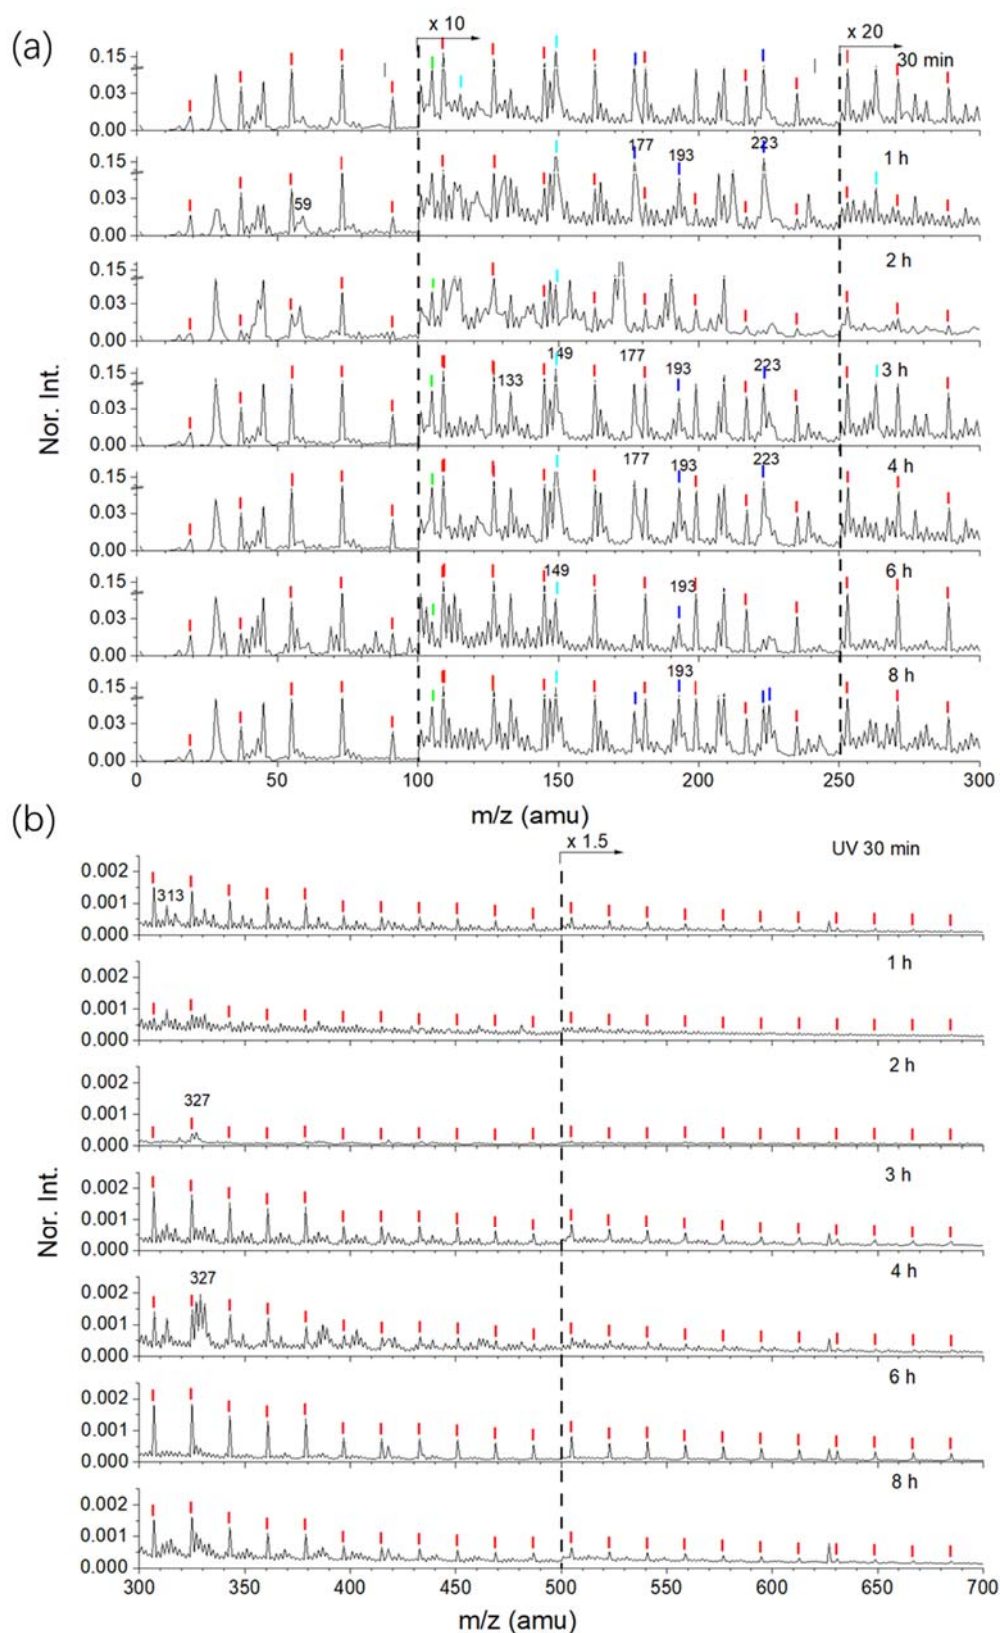

**Fig. S3c.** Comparison of all UV aging SIMS spectral data in the positive ion mode (a)  $m/z^+$  1 – 300 and (b)  $m/z^+$  300 – 700. Red color bars indicate water clusters, green carboxylic acids, pink hydration products, blue oligomers, and cyan color cluster ions. All the spectra were normalized to total ion intensities.

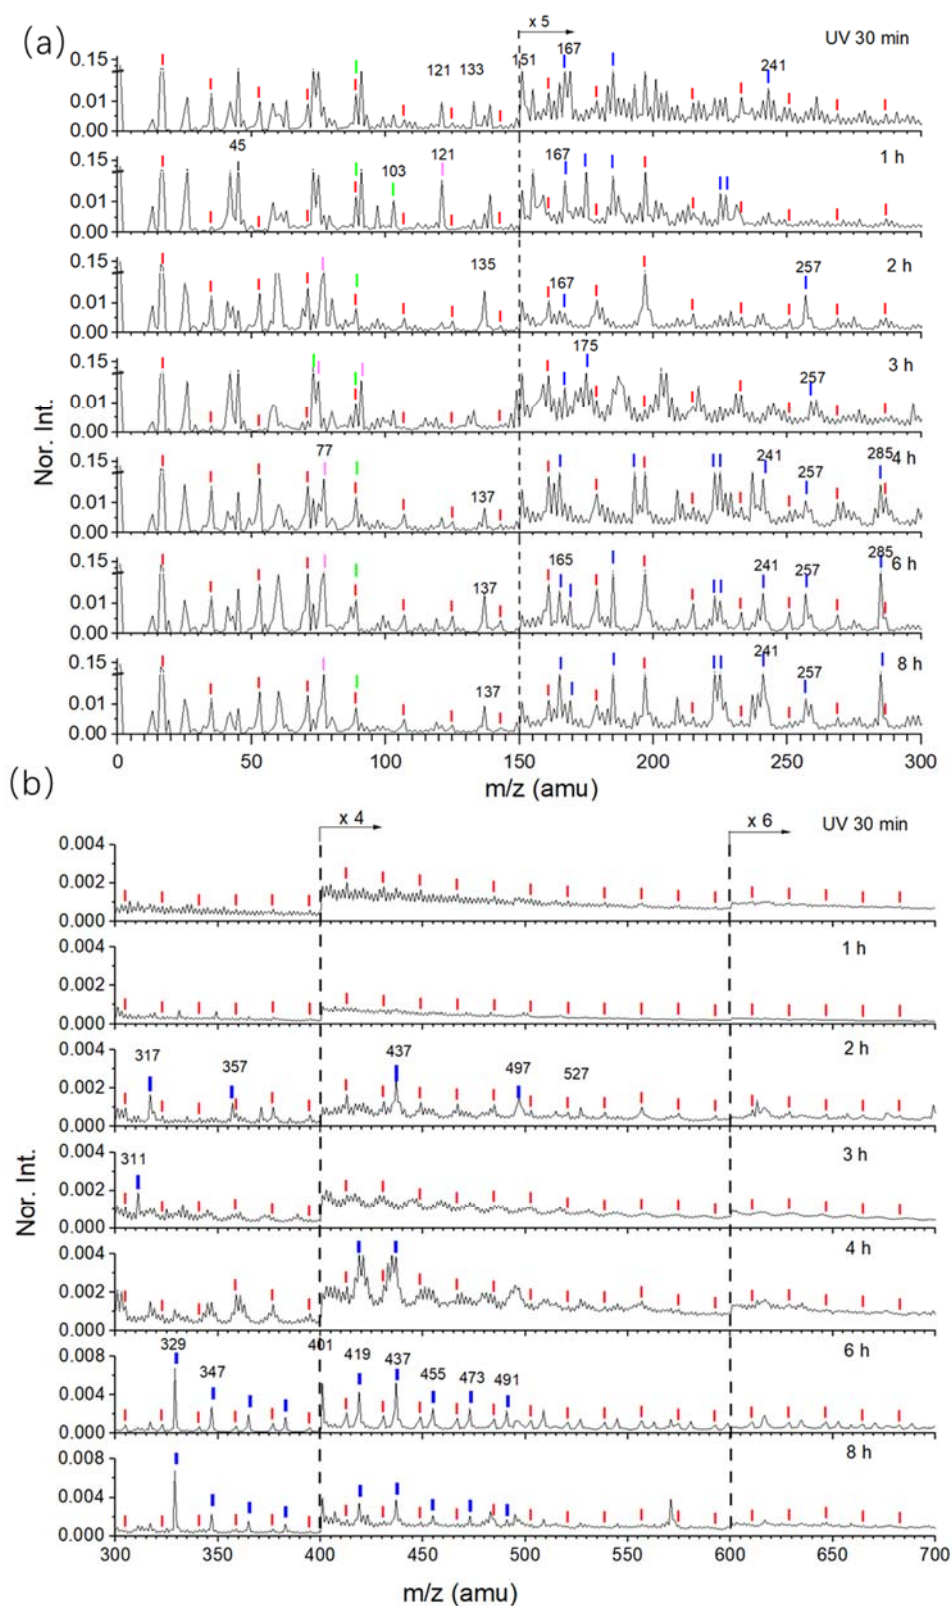

**Fig. S3d.** Comparison of all UV aging spectral data in the negative mode (a)  $m/z$  1 – 300 and (b)  $m/z$  300 – 700. Red color bars indicate water clusters, green carboxylic acids, pink hydration products, blue oligomers, and cyan color cluster ions. All spectra were normalized to total ion intensities.

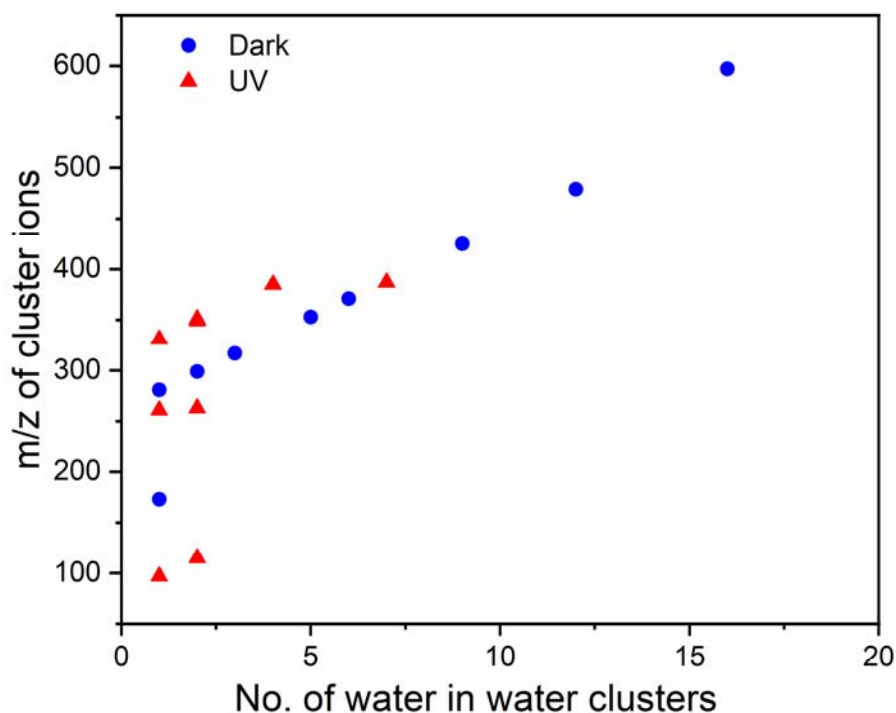

**Fig. S4.** Comparison of the trend between the number of water molecules in co-occurring water clusters and cluster ions in the UV and dark aging in the negative mode.

The x-axis of Fig. S3 represented the number of water molecules in the observed water clusters when there are co-occurring cluster ions from in situ liquid SIMS; and the y-axis represented the  $m/z$  s of the cluster ions observed in UV or dark aging. Fig. S3 shows that the water molecules are more likely to associate with organic molecules to form larger cluster ions during dark aging than UV aging. The small water clusters refer to  $(\text{H}_2\text{O})_n\text{OH}^-$  with  $n$  in the range of 1 to 16 in the negative mode and  $(\text{H}_2\text{O})_n\text{H}^+$  with  $n$  in the range of 1 to 17 in the positive mode in this work. The large water clusters refer to  $(\text{H}_2\text{O})_n\text{OH}^-$  with  $n$  in the range of 17 to 43 in the negative mode and  $(\text{H}_2\text{O})_n\text{H}^+$  with  $n$  in the range of 18 to 44 in this work.

**Supporting Tables****Table S1.** The sample matrices of the glyoxal and hydrogen peroxide oxidation experiments under UV and dark conditions.

| Samples    | Initial composition (mM) |                               | Status | Aging time (h)      | pH   |
|------------|--------------------------|-------------------------------|--------|---------------------|------|
|            | Glyoxal                  | H <sub>2</sub> O <sub>2</sub> |        |                     |      |
| UV aging   |                          |                               |        |                     |      |
| 1          | 5                        | 20                            | Liquid | 0.25                | 4.38 |
| 2          |                          |                               | Liquid | 0.5                 | 4.15 |
| 3          |                          |                               | Liquid | 1                   | 3.97 |
| 4          |                          |                               | Liquid | 2                   | 3.86 |
| 5          |                          |                               | Liquid | 3                   | 3.76 |
| 6          |                          |                               | Liquid | 4                   | 3.70 |
| 7          |                          |                               | Liquid | 6                   | 3.44 |
| 8          |                          |                               | Liquid | 8                   | 3.21 |
| Dark aging |                          |                               |        |                     |      |
| 1          | 5                        | 20                            | Liquid | 0.5                 | 4.5  |
| 2          |                          |                               | Liquid | 1                   | 4.3  |
| 3          |                          |                               | Liquid | 2                   | 3.99 |
| 4          |                          |                               | Liquid | 3                   | 3.9  |
| 5          |                          |                               | Liquid | 4                   | 3.74 |
| 6          |                          |                               | Liquid | 6                   | 3.58 |
| 7          |                          |                               | Liquid | 8                   | 3.45 |
| Control    |                          |                               |        |                     |      |
| 1          | 5                        | 20                            | Liquid | UV 2 hr.            | 8.45 |
| 2          |                          |                               | Liquid | UV 2 hr.            | 4.46 |
| 3          |                          |                               | Liquid | UV 6 hr.            | 4.43 |
| 4          |                          |                               | Liquid | 0                   | 4.49 |
| 5          | 5                        | 20                            | Liquid | 0                   | 8.45 |
| 6          |                          |                               | Dry    | 0                   | 4.49 |
| 7          |                          | 20                            | Dry    | 0                   | 8.45 |
| 8          | Tartaric acid            |                               | Dry    | neither UV nor dark |      |
| 9          | Succinic acid            |                               | Dry    | neither UV nor dark |      |
| 10         | Malonic acid             |                               | Dry    | neither UV nor dark |      |
| 11         | Oxalic acid              |                               | Dry    | neither UV nor dark |      |
| 12         | Malic acid               |                               | Dry    | neither UV nor dark |      |

**Table S2.** The liquid ToF-SIMS measurement uncertainties (%) of 6 hr. of glyoxal and hydrogen peroxide from UV and dark aging experiments.

| UV aging      |              |               | Dark aging |              |               |
|---------------|--------------|---------------|------------|--------------|---------------|
| oligomer      | cluster ions | water cluster | oligomer   | cluster ions | water cluster |
| Positive mode |              |               |            |              |               |
| 2.26          | 2.42         | 0.19          | 1.84       | 9.65         | 0.37          |
| 3.94          | 2.39         | 2.09          | 3.95       | 3.47         | 2.26          |
| 1.67          | 4.81         | 2.29          | 2.1        | 6.18         | 1.89          |
| Negative mode |              |               |            |              |               |
| 3.12          | 2.11         | 3.44          | 3.64       | 2.12         | 0.85          |
| 3.11          | 1.75         | 1.08          | 1.99       | 1.26         | 0.32          |
| 0.01          | 0.36         | 4.52          | 1.66       | 0.86         | 0.53          |

**Table S3.** The main products identified in UV and dark aging in the positive ion mode.

| $m/z^+$ ,<br><i>obs</i> | UV aging               |                                                                       | Dark aging       |                                                               |
|-------------------------|------------------------|-----------------------------------------------------------------------|------------------|---------------------------------------------------------------|
|                         | $[M+H]^+{}^a$          | Possible assignment                                                   | $[M+H]^+$        | Possible assignment                                           |
| Oxidation products      |                        |                                                                       |                  |                                                               |
| 61                      | $C_2H_5O_2^+$          | acetic acid                                                           |                  |                                                               |
| 91                      | $C_2H_3O_4^+$          | oxalic acid                                                           |                  |                                                               |
| 119                     | $C_4H_7O_4^+$          | succinic acid                                                         |                  |                                                               |
| Oligomers/Polymers      |                        |                                                                       |                  |                                                               |
| 117                     | $C_4H_5O_4^+$          | monohydrated glyoxal dimer                                            |                  |                                                               |
| 231                     |                        |                                                                       | $C_6H_{15}O_9^+$ | $m/z^+ 173 C_4H_{13}O_7^+ - C_2H_2O_2$ (glyoxal) <sup>b</sup> |
| 239                     | $C_7H_{11}O_9^+$       | $C_4H_6O_5$ (glyoxal dimer monohydrate) — $C_3H_4O_4$ (malonic acid)  |                  |                                                               |
| 243                     | $C_6H_{11}O_{10}^+$    | $C_4H_{10}O_6$ (dihydrated glyoxal dimer) — $C_2H_2O_4$ (oxalic acid) |                  |                                                               |
| 251                     | $C_8H_{11}O_9^+$       | $m/z^+ 177 C_6H_9O_6^+ - C_2H_4O_4$ (monohydrated glyoxylic acid)     |                  |                                                               |
| 269                     | $C_8H_{13}O_{10}^+$    | $m/z^+ 251 C_8H_{11}O_9^+ - H_2O$                                     |                  |                                                               |
| 285                     | $C_8H_{13}O_{11}^+$    | $m/z^+ 227 C_6H_{11}O_9^+ - C_2H_2O_2$ (glyoxal)                      |                  |                                                               |
| 313                     | $C_9H_{13}O_{12}^+$    | $m/z^+ 239 C_7H_{11}O_9^+ - C_2H_2O_3$ (glyoxylic acid)               |                  |                                                               |
| 315                     | $C_9H_{15}O_{12}^+$    | $m/z^+ 269 C_8H_{13}O_{10}^+ - CH_2O_2$ (formic acid)                 |                  |                                                               |
| 329                     | $C_{10}H_{17}O_{12}^+$ | $m/z^+ 269 C_8H_{13}O_{10}^+ - C_2H_4O_2$ (acetic acid)               |                  |                                                               |
| 401                     | $C_{12}H_{17}O_{15}^+$ | $m/z^+ 327 C_{10}H_{15}O_{12}^+ - C_2H_2O_3$ (glyoxylic acid)         |                  |                                                               |
| 435                     | $C_{13}H_{23}O_{16}^+$ | $m/z^+ 285 C_8H_{13}O_{11}^+ - C_4H_6O_6$ (tartaric acid)             |                  |                                                               |
| 461                     | $C_{11}H_{25}O_{19}^+$ | $m/z^+ 387 C_9H_{23}O_{16}^+ - C_2H_2O_3$ (glyoxylic acid)            |                  |                                                               |
| 493                     | $C_{15}H_{25}O_{18}^+$ | $m/z^+ 435 C_{13}H_{23}O_{16}^+ - C_2H_2O_2$ (glyoxal)                |                  |                                                               |
| Cluster ions            |                        |                                                                       |                  |                                                               |
| 97                      | $C_2H_9O_4^+$          | $m/z^+ 79 C_2H_7O_3^+ \cdots H_2O^c$                                  |                  |                                                               |
| 115                     | $C_2H_{11}O_5^+$       | $m/z^+ 79 C_2H_7O_3^+ \cdots 2H_2O$                                   |                  |                                                               |
| 149                     | $C_5H_9O_5^+$          | $m/z^+ 131 C_5H_7O_4^+ \cdots H_2O$                                   |                  |                                                               |
| 165                     | $C_4H_5O_7^+$          | glyoxylic acid $\cdots C_2H_2O_4$ (oxalic acid)                       |                  |                                                               |

| $m/z^+$ ,<br><i>obs</i> | UV aging               |                                                                 | Dark aging                                      |                                                                       |
|-------------------------|------------------------|-----------------------------------------------------------------|-------------------------------------------------|-----------------------------------------------------------------------|
|                         | $[M+H]^+{}^a$          | Possible assignment                                             | $[M+H]^+$                                       | Possible assignment                                                   |
| 281                     | $C_6H_{17}O_{12}^+$    | $m/z^+ 263 C_6H_{15}O_{11}^+ \cdots H_2O$                       | $C_6H_{17}O_{12}^+$                             | $m/z^+ 263 C_6H_{15}O_{11}^+ \cdots H_2O$                             |
| 331                     | $C_9H_{15}O_{13}^+$    | $m/z^+ 313 C_9H_{13}O_{12}^+ \cdots H_2O$                       |                                                 |                                                                       |
| 341                     | $C_{10}H_{13}O_{13}^+$ | $m/z^+ 251 C_8H_{11}O_9^+ \cdots C_2H_2O_4$<br>(oxalic acid)    |                                                 |                                                                       |
| 349                     | $C_9H_{17}O_{14}^+$    | $m/z^+ 313 C_9H_{13}O_{12}^+ \cdots 2H_2O$                      |                                                 |                                                                       |
| 351                     | $C_9H_{19}O_{14}^+$    | $m/z^+ 315 C_9H_{15}O_{12}^+ \cdots 2H_2O$                      |                                                 |                                                                       |
| 367                     | $C_9H_{19}O_{15}^+$    | $m/z^+ 313 C_9H_{13}O_{12}^+ \cdots 3H_2O$                      |                                                 |                                                                       |
| 369                     | $C_9H_{21}O_{15}^+$    | $m/z^+ 315 C_9H_{15}O_{12}^+ \cdots 3H_2O$                      |                                                 |                                                                       |
| 385                     | $C_9H_{21}O_{16}^+$    | $m/z^+ 313 C_9H_{13}O_{12}^+ \cdots 4H_2O$                      |                                                 |                                                                       |
| 387                     | $C_9H_{23}O_{16}^+$    | $m/z^+ 315 C_9H_{15}O_{12}^+ \cdots 4H_2O$                      |                                                 |                                                                       |
| 421                     | $C_{11}H_{17}O_{17}^+$ | $m/z^+ 331 C_9H_{15}O_{13}^+ \cdots C_2H_2O_4$<br>(oxalic acid) |                                                 |                                                                       |
| 445                     | $C_{11}H_{25}O_{18}^+$ | $m/z^+ 387 C_9H_{15}O_{12}^+ \cdots \text{glyoxal}$             |                                                 |                                                                       |
| 511                     | $C_{15}H_{27}O_{19}^+$ | $m/z^+ 493 C_{15}H_{25}O_{18}^+ \cdots H_2O$                    |                                                 |                                                                       |
| 515                     |                        |                                                                 | $C_6H_{43}O_{26}^+$                             | $m/z^+ 263 C_6H_{15}O_{11}^+ \cdots 14H_2O$                           |
| 525                     |                        |                                                                 | $C_7H_{41}O_{25}^+$                             | $m/z^+ 479 C_6H_{39}O_{23}^+ \cdots CH_2O_2$<br>(formic acid)         |
| 543                     |                        |                                                                 | $C_7H_{43}O_{26}^+$                             | $m/z^+ 525 C_7H_{41}O_{25}^+ \cdots H_2O$                             |
| 551                     |                        |                                                                 | $C_6H_{47}O_{28}^+$ ,<br>$C_{14}H_{31}O_{22}^+$ | $m/z^+ 533 C_6H_{45}O_{27}^+$ ,<br>$C_{14}H_{29}O_{21}^+ \cdots H_2O$ |
| 561                     |                        |                                                                 | $C_7H_{45}O_{27}^+$                             | $m/z^+ 525 C_7H_{41}O_{25}^+ \cdots 2H_2O$                            |
| 579                     |                        |                                                                 | $C_7H_{47}O_{28}^+$                             | $m/z^+ 525 C_7H_{41}O_{25}^+ \cdots 3H_2O$                            |
| 597                     |                        |                                                                 | $C_7H_{49}O_{29}^+$                             | $m/z^+ 525 C_7H_{41}O_{25}^+ \cdots 4H_2O$                            |

<sup>a</sup> Peak assignment uses the peak center to estimate the major component.

<sup>b</sup> This “—” symbol represents the covalent bond formed by chemical reactions.

<sup>c</sup> This “...” symbol represents the van der Waals force, hydrogen bonds, and other weak intermolecular forces between molecules.

**Table S4.** The main products identified in dark and UV aging in the negative ion mode.

| $m/z^-$ ,<br>obs   | UV aging         |                                                                                                                      | Dark aging       |                                                                                                      |
|--------------------|------------------|----------------------------------------------------------------------------------------------------------------------|------------------|------------------------------------------------------------------------------------------------------|
|                    | $[M-H]^-$        | Possible assignment                                                                                                  | $[M-H]^-$        | Possible assignment                                                                                  |
| Oxidation products |                  |                                                                                                                      |                  |                                                                                                      |
| 45                 | $CHO_2^-$        | formic acid                                                                                                          | $CHO_2^-$        | formic acid                                                                                          |
| 73                 | $C_2HO_3^-$      | glyoxylic acid                                                                                                       | $C_2HO_3^-$      | glyoxylic acid                                                                                       |
| 75                 | $C_2H_3O_3^-$    | glycolic acid                                                                                                        |                  |                                                                                                      |
| 89                 | $C_2HO_4^-$      | oxalic acid                                                                                                          | $C_2HO_4^-$      | oxalic acid                                                                                          |
| 91                 |                  |                                                                                                                      | $C_2H_3O_4^-$    | HHPE (Zhao et al., 2012)                                                                             |
| 103                | $C_3H_3O_4^-$    | malonic acid                                                                                                         |                  |                                                                                                      |
| 117                | $C_4H_5O_4^-$    | succinic acid                                                                                                        |                  |                                                                                                      |
| 133                | $C_4H_5O_5^-$    | malic acid                                                                                                           |                  |                                                                                                      |
| 149                | $C_4H_5O_6^-$    | tartaric acid                                                                                                        |                  |                                                                                                      |
| Oligomers/Polymers |                  |                                                                                                                      |                  |                                                                                                      |
| 161                | $C_5H_5O_6^-$    | $C_3H_4O_5$ (malonic acid)— $C_2H_4O_3$ (monohydrated glyoxal)/ $C_2H_2O_4$ (oxalic acid)— $C_2H_2O_4$ (oxalic acid) |                  |                                                                                                      |
| 169                | $C_4H_9O_7^-$    | $C_2H_4O_3$ (monohydrated glyoxal)— $C_2H_6O_4$ (dihydrated glyoxal)                                                 |                  |                                                                                                      |
| 179                | $C_5H_7O_7^-$    | $C_3H_4O_5$ (malonic acid)— $C_2H_6O_4$ (dihydrated glyoxal)                                                         |                  |                                                                                                      |
| 185                |                  |                                                                                                                      | $C_4H_9O_8^-$    | $m/z^-$ 110 $C_2H_6O_5^c$ — $m/z$ 76 $C_2H_4O_3^d$                                                   |
| 189                |                  |                                                                                                                      | $C_6H_5O_7^-$    | $m/z^-$ 116 $C_4H_3O_4^-$ — $m/z$ 74 $C_2H_2O_3$                                                     |
| 193                |                  |                                                                                                                      | $C_5H_5O_8^-$    | $m/z^-$ 120 $C_3H_4O_5$ — $m/z^-$ 74 $C_2H_2O_3$                                                     |
| 209                | $C_6H_9O_8^-$    | $m/z^-$ 133 $C_4H_5O_5^-$ — $C_2H_4O_3$ (monohydrated glyoxal)                                                       |                  |                                                                                                      |
| 217                |                  |                                                                                                                      | $C_4H_9O_{10}^-$ | $m/z^-$ 126 $C_2H_5O_6$ — $m/z$ 92 $C_2H_4O_4$ monohydrated glyoxal dimer— $C_2H_2O_4$ (oxalic acid) |
| 223                | $C_6H_7O_9^-$    | $C_4H_6O_5$ (monohydrated glyoxal dimer)— $C_2H_2O_4$ (oxalic acid)                                                  | $C_6H_7O_9^-$    |                                                                                                      |
| 237                | $C_6H_5O_{10}^-$ | $m/z^-$ 165 $C_4H_5O_7^-$ — $C_2H_2O_4$ (oxalic acid)                                                                |                  |                                                                                                      |
| 239                |                  |                                                                                                                      | $C_6H_7O_{10}^-$ | $m/z^-$ 74 $C_2H_2O_3^-$ — $m/z$ 74 $C_2H_2O_3$ — $m/z$ 92 $C_2H_4O_4$                               |

| $m/z^-$ ,<br>obs | UV aging                                                     |                                                                                                                                                                                                                                                                              | Dark aging                                                  |                                                                                                                                                                                                                                                |
|------------------|--------------------------------------------------------------|------------------------------------------------------------------------------------------------------------------------------------------------------------------------------------------------------------------------------------------------------------------------------|-------------------------------------------------------------|------------------------------------------------------------------------------------------------------------------------------------------------------------------------------------------------------------------------------------------------|
|                  | [M-H] <sup>-</sup>                                           | Possible assignment                                                                                                                                                                                                                                                          | [M-H] <sup>-</sup>                                          | Possible assignment                                                                                                                                                                                                                            |
| 249              | C <sub>8</sub> H <sub>9</sub> O <sub>9</sub> <sup>-</sup>    | 4 C <sub>2</sub> H <sub>4</sub> O <sub>3</sub> (monohydrated glyoxal)                                                                                                                                                                                                        |                                                             |                                                                                                                                                                                                                                                |
| 261              |                                                              |                                                                                                                                                                                                                                                                              | C <sub>6</sub> H <sub>13</sub> O <sub>11</sub> <sup>-</sup> | $m/z^-$ 110<br>C <sub>2</sub> H <sub>6</sub> O <sub>5</sub> <sup>-</sup> — $m/z$ 76<br>C <sub>2</sub> H <sub>4</sub> O <sub>3</sub> — $m/z$ 76<br>C <sub>2</sub> H <sub>4</sub> O <sub>3</sub>                                                 |
| 283              | C <sub>8</sub> H <sub>11</sub> O <sub>11</sub> <sup>-</sup>  | C <sub>4</sub> H <sub>6</sub> O <sub>6</sub> (monohydrated tartaric acid)— C <sub>4</sub> H <sub>6</sub> O <sub>5</sub> malic acid                                                                                                                                           |                                                             |                                                                                                                                                                                                                                                |
| 285              | C <sub>8</sub> H <sub>13</sub> O <sub>11</sub> <sup>-</sup>  | C <sub>6</sub> H <sub>12</sub> O <sub>9</sub> (dihydrated glyoxal trimer)— C <sub>2</sub> H <sub>2</sub> O <sub>2</sub> (glyoxal)                                                                                                                                            |                                                             |                                                                                                                                                                                                                                                |
| 299              | C <sub>8</sub> H <sub>11</sub> O <sub>12</sub> <sup>-</sup>  | C <sub>2</sub> H <sub>4</sub> O <sub>3</sub> (monohydrated glyoxal)— C <sub>2</sub> H <sub>2</sub> O <sub>3</sub> (glyoxylic acid)— C <sub>4</sub> H <sub>6</sub> O <sub>6</sub> (tartaric acid)                                                                             |                                                             |                                                                                                                                                                                                                                                |
| 303              |                                                              |                                                                                                                                                                                                                                                                              | C <sub>7</sub> H <sub>11</sub> O <sub>13</sub> <sup>-</sup> | $m/z^-$ 257<br>C <sub>6</sub> H <sub>9</sub> O <sub>11</sub> CH <sub>2</sub> O <sub>2</sub> (formic acid)                                                                                                                                      |
| 307              |                                                              |                                                                                                                                                                                                                                                                              | C <sub>6</sub> H <sub>11</sub> O <sub>14</sub> <sup>-</sup> | $m/z^-$ 126 C <sub>2</sub> H <sub>5</sub> O <sub>6</sub> —<br>$m/z$ 90 C <sub>2</sub> H <sub>2</sub> O <sub>4</sub> —<br>$m/z^-$ 92 C <sub>2</sub> H <sub>4</sub> O <sub>4</sub><br>$m/z^-$ 126 C <sub>2</sub> H <sub>5</sub> O <sub>6</sub> — |
| 309              |                                                              |                                                                                                                                                                                                                                                                              | C <sub>6</sub> H <sub>13</sub> O <sub>14</sub> <sup>-</sup> | $m/z$ 92 C <sub>2</sub> H <sub>4</sub> O <sub>4</sub> —<br>$m/z$ 92 C <sub>2</sub> H <sub>4</sub> O <sub>4</sub>                                                                                                                               |
| 311              | C <sub>9</sub> H <sub>11</sub> O <sub>12</sub> <sup>-</sup>  | $m/z^-$ 237 C <sub>6</sub> H <sub>5</sub> O <sub>10</sub> <sup>-</sup> — C <sub>2</sub> H <sub>2</sub> O <sub>3</sub> (glyoxylic acid)/ $m/z^-$ 161 C <sub>5</sub> H <sub>5</sub> O <sub>6</sub> <sup>-</sup> — C <sub>4</sub> H <sub>6</sub> O <sub>6</sub> (tartaric acid) |                                                             |                                                                                                                                                                                                                                                |
| 317              | C <sub>8</sub> H <sub>13</sub> O <sub>13</sub> <sup>-</sup>  | C <sub>2</sub> H <sub>4</sub> O <sub>3</sub> (monohydrated glyoxal)—C <sub>2</sub> H <sub>2</sub> O <sub>3</sub> (glyoxylic acid)—C <sub>4</sub> H <sub>8</sub> O <sub>7</sub> (monohydrated tartaric acid)                                                                  |                                                             |                                                                                                                                                                                                                                                |
| 329              | C <sub>9</sub> H <sub>13</sub> O <sub>13</sub> <sup>-</sup>  | $m/z^-$ 311 C <sub>9</sub> H <sub>11</sub> O <sub>12</sub> <sup>-</sup> —H <sub>2</sub> O<br>C <sub>4</sub> H <sub>8</sub> O <sub>7</sub> (monohydrated tartaric acid)—C <sub>4</sub> H <sub>8</sub> O <sub>5</sub>                                                          |                                                             |                                                                                                                                                                                                                                                |
| 343              | C <sub>10</sub> H <sub>15</sub> O <sub>13</sub> <sup>-</sup> | (monohydrated malic acid)—C <sub>2</sub> H <sub>4</sub> O <sub>2</sub> (acetic acid)                                                                                                                                                                                         |                                                             |                                                                                                                                                                                                                                                |
| 357              | C <sub>10</sub> H <sub>13</sub> O <sub>14</sub> <sup>-</sup> | 2 C <sub>2</sub> H <sub>4</sub> O <sub>3</sub> (monohydrated glyoxal)—C <sub>2</sub> H <sub>2</sub> O <sub>3</sub> (glyoxylic acid)—C <sub>4</sub> H <sub>8</sub> O <sub>7</sub> (monohydrated tartaric acid)                                                                |                                                             |                                                                                                                                                                                                                                                |
| 359              | C <sub>10</sub> H <sub>15</sub> O <sub>14</sub> <sup>-</sup> | C <sub>4</sub> H <sub>6</sub> O <sub>5</sub> (malic acid)—C <sub>2</sub> H <sub>3</sub> O <sub>3</sub> (glycolic acid)/C <sub>4</sub> H <sub>5</sub> O <sub>6</sub> (tartaric acid)···3H <sub>2</sub> O                                                                      |                                                             |                                                                                                                                                                                                                                                |
| 377              | C <sub>10</sub> H <sub>17</sub> O <sub>15</sub> <sup>-</sup> | $m/z^-$ 359 C <sub>10</sub> H <sub>15</sub> O <sub>14</sub> <sup>-</sup> ···H <sub>2</sub> O                                                                                                                                                                                 |                                                             |                                                                                                                                                                                                                                                |
| 383              | C <sub>12</sub> H <sub>15</sub> O <sub>14</sub> <sup>-</sup> | 6 glyoxal dihydrate                                                                                                                                                                                                                                                          |                                                             |                                                                                                                                                                                                                                                |
| 401              | C <sub>12</sub> H <sub>17</sub> O <sub>15</sub> <sup>-</sup> | 5 glyoxal dihydrate—monohydrated glyoxal                                                                                                                                                                                                                                     |                                                             |                                                                                                                                                                                                                                                |

| $m/z^-$ ,<br>obs | UV aging               |                                                                                                                                                                                              | Dark aging          |                                                |
|------------------|------------------------|----------------------------------------------------------------------------------------------------------------------------------------------------------------------------------------------|---------------------|------------------------------------------------|
|                  | $[M-H]^-$              | Possible assignment                                                                                                                                                                          | $[M-H]^-$           | Possible assignment                            |
| 419              | $C_{12}H_{19}O_{16}^-$ | 4 glyoxal dihydrate—2 monohydrated glyoxal                                                                                                                                                   |                     |                                                |
| 421              | $C_{14}H_{13}O_{15}^-$ | 6 glyoxal—monohydrated glyoxal                                                                                                                                                               |                     |                                                |
| 437              | $C_{12}H_{21}O_{17}^-$ | glyoxal—5 monohydrated glyoxal                                                                                                                                                               |                     |                                                |
| 455              | $C_{12}H_{23}O_{18}^-$ | 6 monohydrated glyoxal                                                                                                                                                                       |                     |                                                |
| 473              | $C_{12}H_{25}O_{19}^-$ | 5 monohydrated glyoxal—dihydrated glyoxal                                                                                                                                                    |                     |                                                |
| 491              | $C_{12}H_{27}O_{20}^-$ | 4 monohydrated glyoxal—2 dihydrated glyoxal                                                                                                                                                  |                     |                                                |
| 499              | $C_{16}H_{19}O_{18}^-$ | 6 glyoxal—2 monohydrated glyoxal                                                                                                                                                             |                     |                                                |
| 509              | $C_{12}H_{29}O_{21}^-$ | 3 monohydrated glyoxal—3 dihydrated glyoxal                                                                                                                                                  |                     |                                                |
| 527              | $C_{12}H_{31}O_{22}^-$ | 2 monohydrated glyoxal—4 dihydrated glyoxal                                                                                                                                                  |                     |                                                |
| 545              | $C_{12}H_{33}O_{23}^-$ | 1 monohydrated glyoxal—5 dihydrated glyoxal                                                                                                                                                  |                     |                                                |
| 557              | $C_{18}H_{21}O_{20}^-$ | 7 glyoxal—2 monohydrated glyoxal                                                                                                                                                             |                     |                                                |
| Cluster ions     |                        |                                                                                                                                                                                              |                     |                                                |
| 63               |                        |                                                                                                                                                                                              | $CH_3O_3^-$         | $m/z^-$ 45<br>$CHO_2^- \cdots H_2O^b$          |
| 139              |                        |                                                                                                                                                                                              | $C_2H_3O_7^-$       | $m/z^-$ 121<br>$C_2HO_6^- \cdots H_2O$         |
| 241              | $C_6H_9O_{10}^-$       | $m/z^-$ 223 $C_6H_7O_9^- \cdots H_2O^b$<br>2 $C_2H_2O_4$ (oxalic acid) $\cdots$ $C_3H_4O_2$ (hydroxy acids) $\cdots H_2O/m/z^-$ 99 $C_3O_5^- \cdots m/z^-$ 133<br>$C_4H_5O_5^- \cdots 2H_2O$ |                     |                                                |
| 269              | $C_7H_9O_{11}^-$       |                                                                                                                                                                                              |                     |                                                |
| 335              |                        |                                                                                                                                                                                              | $C_6H_{17}O_{16}^-$ | $m/z^-$ 317<br>$C_6H_{15}O_{15}^- \cdots H_2O$ |
| 359              | $C_{10}H_{15}O_{14}^-$ | $C_4H_6O_5$ (malic acid)— $C_2H_4O_3$ (glycolic acid)— $C_4H_6O_6$ (tartaric acid) $\cdots 3H_2O$                                                                                            |                     |                                                |
| 617              | $C_{20}H_{25}O_{22}^-$ | $m/z^-$ 557 $C_{18}H_{21}O_{20}^- \cdots C_2H_4O_2$ (acetic acid)                                                                                                                            |                     |                                                |
| 635              | $C_{19}H_{23}O_{24}^-$ | $m/z^-$ 617 $C_{20}H_{25}O_{22}^- \cdots H_2O$                                                                                                                                               |                     |                                                |

<sup>a</sup> Peak assignment uses the peak center to estimate the major component.

<sup>b</sup> This “—” symbol represents the van der Waals force, hydrogen bonds, and other weak intermolecular forces between molecules.

<sup>c</sup> This “...” symbol represents the covalent bond formed by chemical reactions.

**Table S5.** The calculated binding energy of representative cluster ions using AIMD simulations.

| $m/z^+$ | Possible peak assignment                                                       | Binding energy per molecule (kJ/mol) |
|---------|--------------------------------------------------------------------------------|--------------------------------------|
| 55      | $\text{H}^+\text{H}_2\text{O}_3$                                               | -81                                  |
| 109     | $\text{H}^+\text{H}_2\text{O}_6$                                               | -70                                  |
| 113     | $\text{H}^+\text{H}_2\text{O}_3\cdots\text{C}_2\text{H}_2\text{O}_2$           | -84                                  |
| 165     | $\text{H}^+\text{C}_2\text{H}_3\text{O}_3\cdots\text{C}_2\text{H}_2\text{O}_4$ | -62                                  |
| 173     | $\text{H}^+\text{C}_4\text{H}_{10}\text{O}_6\cdots\text{H}_2\text{O}$          | -53                                  |
| 263     | $\text{H}^+\text{C}_4\text{H}_8\text{O}_6\cdots\text{C}_2\text{H}_6\text{O}_5$ | -70                                  |

## References

- Adamo, C., Barone, V., 1999. Toward reliable density functional methods without adjustable parameters: The PBE0 model. *J Chem Phys* 110, 6158-6170.
- Bruny, G., Eden, S., Feil, S., Fillol, R., El Farkh, K., Harb, M.M., Teyssier, C., Ouaskit, S., Abdoul-Carime, H., Farizon, B., Farizon, M., Mark, T.D., 2012. A new experimental setup designed for the investigation of irradiation of nanosystems in the gas phase: A high intensity mass-and-energy selected cluster beam. *Rev. Sci. Instrum.* 83, 013305.
- Hirata, S., Head-Gordon, M., 1999. Time-dependent density functional theory within the Tamm-Dancoff approximation. *Chem. Phys. Lett.* 314, 291-299.
- Pritchard, B.P., Altarawy, D., Didier, B., Gibson, T.D., Windus, T.L., 2019. New Basis Set Exchange: An Open, Up-to-Date Resource for the Molecular Sciences Community. *J Chem Inf Model* 59, 4814-4820.
- Sosnik, A., Sodhi, R.N.S., Brodersen, P.M., Sefton, M.V., 2006. Surface study of collagen/poloxamine hydrogels by a 'deep freezing' ToF-SIMS approach. *Biomaterials* 27, 2340-2348.
- Sui, X., Zhou, Y.F., Zhang, F., Chen, J.M., Zhu, Z.H., Yu, X.Y., 2017. Deciphering the aqueous chemistry of glyoxal oxidation with hydrogen peroxide using molecular imaging. *Phys Chem Chem Phys* 19, 20357-20366.
- Sui, X., Zhou, Y.F., Zhang, F., Zhang, Y.Y., Chen, J.M., Zhu, Z.H., Yu, X.Y., 2018. ToF-SIMS characterization of glyoxal surface oxidation products by hydrogen peroxide: A comparison between dry and liquid samples. *Surf. Interface Anal.* 50, 927-938.
- Vaida, V., 2011. Perspective: Water cluster mediated atmospheric chemistry. *J. Chem. Phys.* 135, 020901.
- Valiev, M., Bylaska, E.J., Govind, N., Kowalski, K., Straatsma, T.P., Van Dam, H.J.J., Wang, D., Nieplocha, J., Apra, E., Windus, T.L., de Jong, W., 2010. NWChem: A comprehensive and scalable open-source solution for large scale molecular simulations. *Comput. Phys. Commun.* 181, 1477-1489.
- VandeVondele, J., Krack, M., Mohamed, F., Parrinello, M., Chassaing, T., Hutter, J., 2005. QUICKSTEP: Fast and accurate density functional calculations using a mixed Gaussian and plane waves approach. *Comput. Phys. Commun.* 167, 103-128.
- Verlet, J.R.R., Bragg, A.E., Kammrath, A., Cheshnovsky, O., Neumark, D.M., 2005. Observation of large water-cluster anions with surface-bound excess electrons. *Science* 307, 93-96.
- Verlet, L., 1967. Computer Experiments on Classical Fluids .I. Thermodynamical Properties of Lennard-Jones Molecules. *Phys Rev* 159, 98-103.
- Yang, L., Yu, X.-Y., Zhu, Z., Thevuthasan, T., Cowin, J.P., 2011a. Making a hybrid microfluidic platform compatible for in situ imaging by vacuum-based techniques. *J. Vac. Sci. Technol. A* 29, 061101.
- Yang, L., Yu, X.Y., Zhu, Z.H., Iedema, M.J., Cowin, J.P., 2011b. Probing liquid surfaces under vacuum using SEM and ToF-SIMS. *Lab Chip* 11, 2481-2484.
- Zhang, F., Yu, X., Chen, J., Zhu, Z., Yu, X.-Y., 2019a. Dark air-liquid interfacial chemistry of glyoxal and hydrogen peroxide. *npj Clim. Atmos. Sci.* 2, 28.

Zhang, F., Yu, X.F., Sui, X., Chen, J.M., Zhu, Z.H., Yu, X.Y., 2019b. Evolution of aqSOA from the Air-Liquid Interfacial Photochemistry of Glyoxal and Hydroxyl Radicals. *Environ Sci Technol* 53, 10236-10245.

Zhao, R., Lee, A.K.Y., Abbatt, J.P.D., 2012. Investigation of Aqueous-Phase Photooxidation of Glyoxal and Methylglyoxal by Aerosol Chemical Ionization Mass Spectrometry: Observation of Hydroxyhydroperoxide Formation. *J. Phys. Chem. A* 116, 6253-6263.
